# Supplementary material
Source: PubMed Central journal article supplement (PMC2666043)
Supplement: NIHMS79188-supplement-01.pdf [file NIHMS79188-supplement-01.pdf]

## Supplement Material

**Supplemental Table I: Body weight, serum cholesterol and triglyceride levels in *ApoE*<sup>-/-</sup> and *ApoE*<sup>-/-</sup> *Cd36*<sup>-/-</sup> *Msr1*<sup>-/-</sup> mice after 12 weeks on the Western Diet**

| Genotype                                                                         | n  | Body Weight (g) | Total Cholesterol (mg/dL) | Triglyceride (mg/dL) |
|----------------------------------------------------------------------------------|----|-----------------|---------------------------|----------------------|
| <u>Male</u>                                                                      |    |                 |                           |                      |
| <i>ApoE</i> <sup>-/-</sup>                                                       | 22 | 33.90 ± 3.19    | 1,413 ± 391               | 78 ± 28              |
| <i>ApoE</i> <sup>-/-</sup> <i>Cd36</i> <sup>-/-</sup> <i>Msr1</i> <sup>-/-</sup> | 22 | 29.41 ± 4.07*   | 1,625 ± 603               | 107 ± 28*            |
| <u>Female</u>                                                                    |    |                 |                           |                      |
| <i>ApoE</i> <sup>-/-</sup>                                                       | 22 | 23.08 ± 2.41    | 1,521 ± 383               | 72 ± 39              |
| <i>ApoE</i> <sup>-/-</sup> <i>Cd36</i> <sup>-/-</sup> <i>Msr1</i> <sup>-/-</sup> | 18 | 20.15 ± 1.53*   | 1,614 ± 435               | 83 ± 31              |

Values are mean ± SD. \*p < 0.005, as compared with *ApoE*<sup>-/-</sup> by ANOVA. Cholesterol and Female Triglyceride N.S. by ANOVA

## Supplementary Figure I

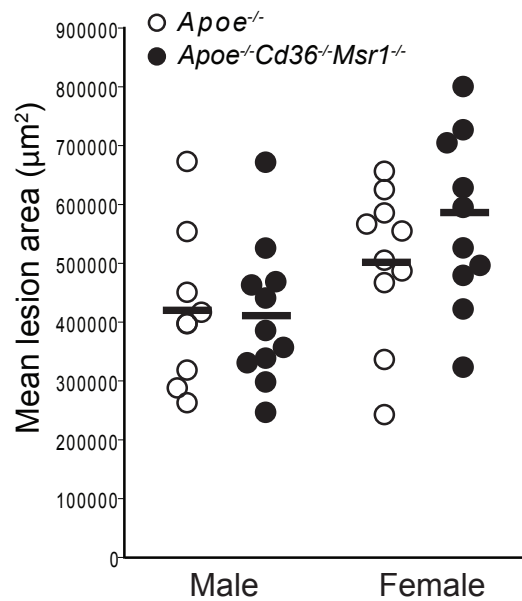

Supplementary Figure I. Independent analysis of aortic root atherosclerosis in hyperlipidemic *Apoe*<sup>-/-</sup> and *Apoe*<sup>-/-</sup>*Cd36*<sup>-/-</sup>*Msr1*<sup>-/-</sup> mice confirms that deletion of SR-A and CD36 does not reduce lesion size. Aortic root atherosclerosis quantified in figure 1 was analyzed independently at Columbia University.
